# Supplementary material
Source: publisher figshare collection journal article supplement (https://acs.figshare.com/ndownloader/files/4445860)
Supplement: Supplementary file 1 [file 4445860]

## Supporting Information

### Molecular Understanding for the Adsorption of Water and Alcohols in Hydrophilic and Hydrophobic Zeolitic Metal–Organic Frameworks

A. Nalaparaju, X. S. Zhao, and J. W. Jiang\*

Department of Chemical and Biomolecular Engineering, National University of Singapore, 117576, Singapore

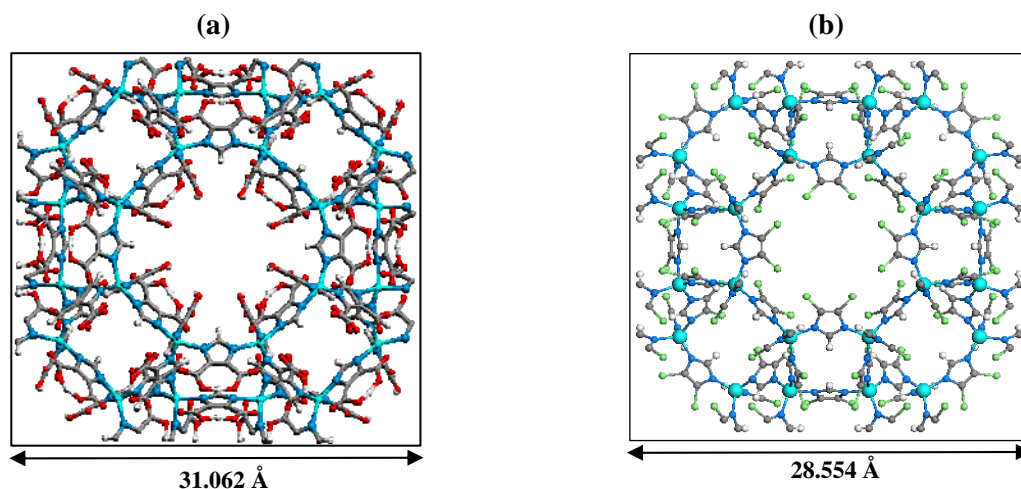

**Figure S1.** Unit cells of (a) *rho*-ZMOF and (b) ZIF-71. Color code: In/Zn, cyan; N, blue; C, grey; O, red; Cl, green; and H, white. The nonframework  $\text{Na}^+$  ions in *rho*-ZMOF are not shown.

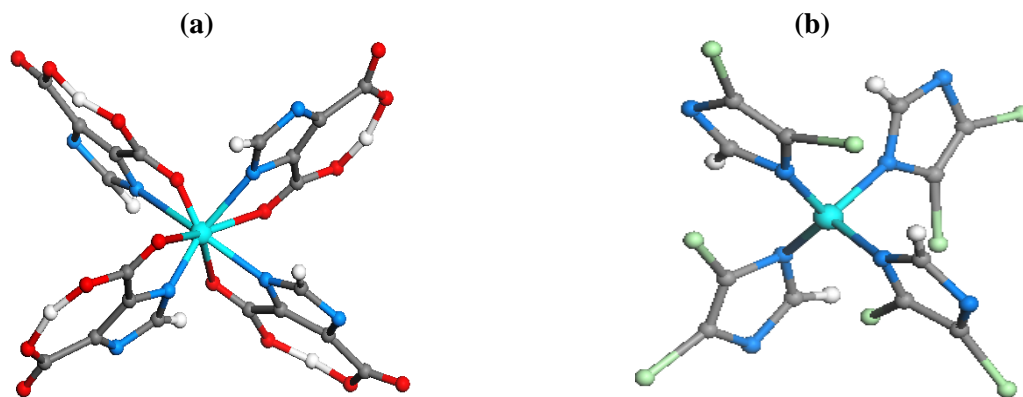

**Figure S2.** (a) Eight- and (b) four-coordinated molecular building blocks in *rho*-ZMOF and ZIF-71. Color code: In/Zn, cyan; N, blue; C, grey; O, red; Cl, green; and H, white.

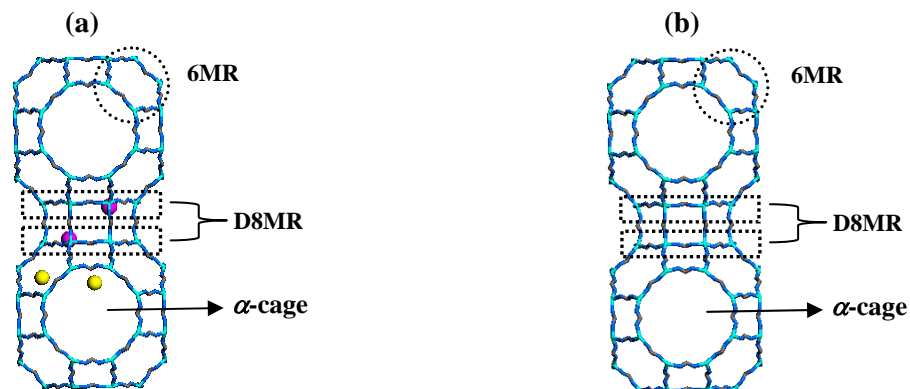

**Figure S3.** Zeolite-analogue representation of (a) Na-*rho*-ZMOF and (b) ZIF-71. Two types of binding sites exist for Na<sup>+</sup> ions in Na-*rho*-ZMOF, in which site I (pink) is at the single eight-membered ring (S8MR) and site II (yellow) is in the  $\alpha$ -cage. The two S8MRs form a double eight-membered ring (D8MR).

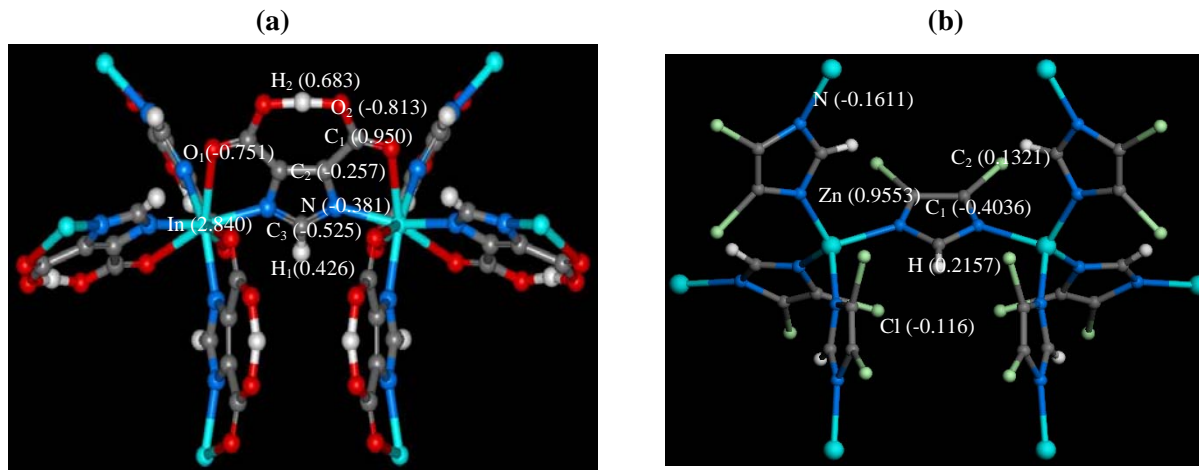

**Figure S4.** Atomic charges in the fragmental clusters of (a) *rho*-ZMOF and (b) ZIF-71. Color code: In/Zn, cyan; N, blue; C, grey; O, red; Cl, green; and H, white.

**Table S1.** Lennard-Jones parameters of the framework atoms in *rho*-ZMOF and ZIF-71.

| Atom | $\sigma$ (Å) | $\varepsilon$ (kJ/mol) |
|------|--------------|------------------------|
| In   | 3.976        | 2.504                  |
| Zn   | 2.461        | 0.519                  |
| N    | 3.260        | 0.288                  |
| O    | 3.118        | 0.251                  |
| C    | 3.431        | 0.439                  |
| H    | 2.571        | 0.184                  |
| Cl   | 3.516        | 0.949                  |

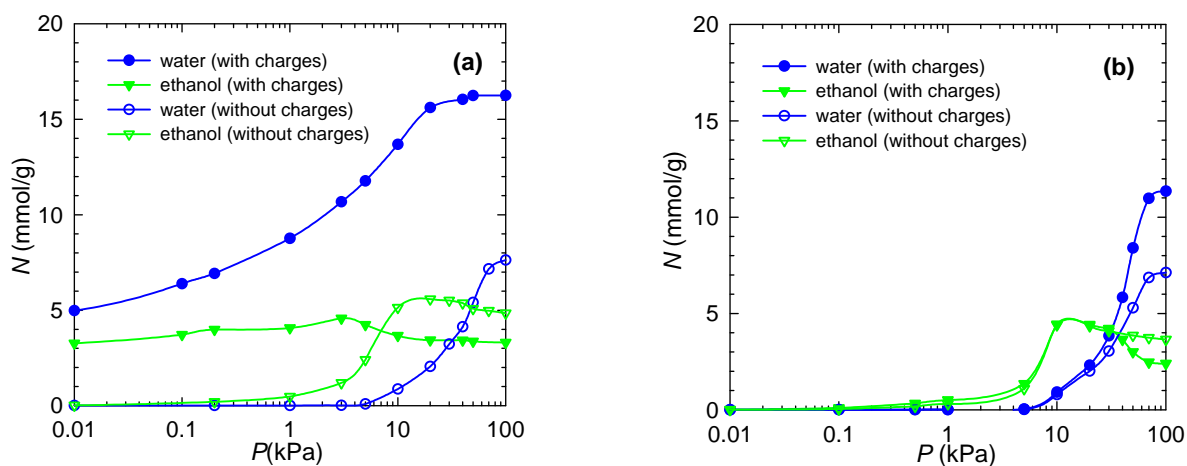**Figure S5.** Adsorption isotherms for the equimolar mixture of water/ethanol in (a) Na-*rho*-ZMOF and (b) ZIF-71 with and without the framework charges. The framework charges have a substantial effect on adsorption in hydrophilic Na-*rho*-ZMOF, but a small effect in hydrophobic ZIF-71. The isotherms in Na-*rho*-ZMOF without the framework charges behave like in ZIF-71.
